# Supplementary material for: Prothoracicostatic Activity of the Ecdysis-Regulating Neuropeptide Crustacean Cardioactive Peptide (CCAP) in the Desert Locust
Source: MDPI journal article supplement (doi:10.3390/ijms222413465), 2021-12-15
Supplement: s1 [file s1]

**Table S4**

Oligonucleotide sequences for primers used in qRT-PCR.

| Reference genes                | Forward primer                  | Reverse primer               |
|--------------------------------|---------------------------------|------------------------------|
| <i>CG13220</i>                 | 5'-TG TTCAGTTTTGGCTCTGTTCTGA-3' | 5'- ACTGTTCTCCGGCAGAATTGC-3' |
| <i>EF1<math>\alpha</math></i>  | 5'-GATGCTCCAGGCCACAGAGA-3'      | 5'-TGCACAGTCGGCCTGTGAT-3'    |
| <i>RP49</i>                    | 5'-CGCTACAAGAAGCTTAAGAGGTCAT-3' | 5'-CCTACGGCGCACTCTGTTG-3'    |
| <i>GAPDH</i>                   | 5'-GTCTGATGACAACAGTGCAT-3'      | 5'-GTCCATCACGCCACAAC TTTC-3' |
| <i><math>\alpha</math>-Tub</i> | 5'- TGACAATGAGGCCATCTATG-3'     | 5'- CGCAAAGATGCTGTGATTGA-3'  |

  

| Target genes         | Forward primer                | Reverse primer               |
|----------------------|-------------------------------|------------------------------|
| <i>Schgr-CCAPpre</i> | 5'-AAAATGAAGAGACCCTTCTGCAA-3' | 5'-TCTCGTCCGACCGCTTCT-3'     |
| <i>Schgr-CCAPR-1</i> | 5'-GCTGTCGTCTCCATCGTCTA-3'    | 5'-GAAGAAGCCGCTCGAATTGG-3'   |
| <i>Schgr-CCAPR-2</i> | 5'-CCTTTCGTGACGCCTCTGA-3'     | 5'- CCGAAATTCATTGCCCACTGT-3' |
| <i>Schgr-CCAPR-3</i> | 5'-TCTGGCCATCTGTCTTTCT-3'     | 5'- ATTCTTGTTGGCCGCTGTTG-3'  |

Abbreviations: EF1 $\alpha$  = *elongation factor 1 alpha*, RP49 = *ribosomal protein 49*, GAPDH = *Glyceraldehyde-3-phosphate dehydrogenase*,  $\alpha$ -Tub=  *$\alpha$ -Tubulin*, CCAPpre = *crustacean cardioactive peptide precursor*, CCAPR = *crustacean cardioactive peptide receptor*.
