# Supplementary material for: Prothoracicostatic Activity of the Ecdysis-Regulating Neuropeptide Crustacean Cardioactive Peptide (CCAP) in the Desert Locust
Source: MDPI journal article supplement (doi:10.3390/ijms222413465), 2021-12-15
Supplement: s1 [file s1]

**Figure S1.**

|                       |     |                                                                |
|-----------------------|-----|----------------------------------------------------------------|
| <i>Schgr</i> -CCAPR-1 | 1   | -----M                                                         |
| <i>Schgr</i> -CCAPR-2 | 1   | -----M                                                         |
| <i>Schgr</i> -CCAPR-3 | 1   | -----MGA-----M                                                 |
| <i>Rhopr</i> -CCAPR   | 1   | -----M                                                         |
| <i>Drome</i> -CCAPR   | 1   | MLHLRLFDSSLYYTLASASESSGLASSTSTERSFNQTQGAGGVAAGGESLTPTDVAAVNLM  |
| <i>Trica</i> -CCAPR-1 | 1   | -----M                                                         |
| <i>Trica</i> -CCAPR-2 | 1   | -----M                                                         |
| <i>Schgr</i> -CCAPR-1 | 2   | DDING-----TNASDAAPVINSFY                                       |
| <i>Schgr</i> -CCAPR-2 | 2   | DASAGGNATAS-----SLLPGDGADN-----LTADAAAANDTQEVINSFY             |
| <i>Schgr</i> -CCAPR-3 | 5   | EEPPPAAVTSPDSEAALTSPAPSPAVVTTTAVPDWSTTDFSGLLYTAATSGEDINSFY     |
| <i>Rhopr</i> -CCAPR   | 2   | DWVIRDNYSNP-----AANITNTTDEINSFY                                |
| <i>Drome</i> -CCAPR   | 61  | TYFTPAISHVMLAPTTIATTTASATMVQIQTTAAPSHDLETGGNSTSSDPGEFDNINSFY   |
| <i>Trica</i> -CCAPR-1 | 2   | SYIEDAN-----ETDSNNTSLDAFY                                      |
| <i>Trica</i> -CCAPR-2 | 2   | SGAPIPDVGQS-----WLKSNSLAGFEVNS-----SEQLTTPPT-DINSFY            |
| <i>Schgr</i> -CCAPR-1 | 21  | FYETEQFAVLWSLFTLIVVGNAAVLVTLLAGKRRKSRMNFFIVQLALADLSVGLISVLTD   |
| <i>Schgr</i> -CCAPR-2 | 42  | FYETEQFTVLWILFASIVLGNAAVLVALLVNKARKSRMNFFIMHLALADLSVGLISVLTD   |
| <i>Schgr</i> -CCAPR-3 | 65  | FYQTEQFTVLWILFALIVLGNASVLIALLYINKNRKSRMNFFIMQLALADLTVGLINVLTD  |
| <i>Rhopr</i> -CCAPR   | 28  | FYQTEQFTVLWILFAAIVLGNASVLIALLFNKSSKSRMNFFIMHLAFADLSVGLISVLTD   |
| <i>Drome</i> -CCAPR   | 121 | FYETEQFAVLWILFTVIVLGNASVLFVFMFINKNRKSARMNYFIKQLALADLCVGLINVLTD |
| <i>Trica</i> -CCAPR-1 | 22  | FETEQFTLLWVLFVIVVAGNVGVLYTLLFGRSRKSRMNIFYITHLALADLSVGLINVLTD   |
| <i>Trica</i> -CCAPR-2 | 44  | FYKTEQFTVLWVLFMIVLGNASVLLVSKSRKSRMNFFICQLATADLAVGLISVSTD       |
| <i>Schgr</i> -CCAPR-1 | 81  | IWRMTVAWNAGNAACKLIRFLQAVVTSSTYVLVALSIDRYDAITHPMNFGSGSWRRARL    |
| <i>Schgr</i> -CCAPR-2 | 102 | IWRMTVSWNAGNAACKLIRFLQVVVTSSTYVLVALSIDRYDAITHPMNFGSGSWRRARL    |
| <i>Schgr</i> -CCAPR-3 | 125 | ITRITLVWYAGNVACKIVRFLQAVVTSSTYVLVALSIDRYDAITHPMNFGSGSWRRARA    |
| <i>Rhopr</i> -CCAPR   | 88  | IWRITVWKAGNVCKVRFVQAVVTSSTYVLVALSIDRLDAITRPMNFGSGSWRRARL       |
| <i>Drome</i> -CCAPR   | 181 | IWRITVWRAGNLACKAIRFSQVCVTSSTYVLVAMSIDRYDAITHPMNFSKSWKRARH      |
| <i>Trica</i> -CCAPR-1 | 82  | IWRITVVAWYAGNVACKIVRFLQVVVTSSTYVLVALSIDRYDAIRHPMKFSGSWKRARY    |
| <i>Trica</i> -CCAPR-2 | 104 | IWRITVAWYAGNVLCIIRFLQAVVTSSTYVLVALSIDRYDAITHPMNFGSGSWKRARV     |
| <i>Schgr</i> -CCAPR-1 | 141 | LVAAWLLSAVFSVPVIAVLYHERPVEGRLLQCWIDFPQAWQWQLYMTLVALTFLFALPAVIL |
| <i>Schgr</i> -CCAPR-2 | 162 | LVLSAWLLSFLFSVPILIFYEEKTIQGHQPQCWIDFQERWQWRLYMTLVTTTLFVLPAII   |
| <i>Schgr</i> -CCAPR-3 | 185 | LVVTAWGLSFLFSIPSMIFFEEQPIQGHACQWIDFPHNWQWQVYMTLVAVALFIVPTVIL   |
| <i>Rhopr</i> -CCAPR   | 148 | LVGFSWALSFAFFSSPILILYKERLIQGSFQCWIELGSTLKWQIYMSLVAVSLFLVPAVIL  |
| <i>Drome</i> -CCAPR   | 241 | LVAGAWLLSALFSLPILVLYEEKLIQGHQPQCWIELGSPIAWQVYMSLVSATLFAIPALII  |
| <i>Trica</i> -CCAPR-1 | 142 | LIIAAWFFSALYSLPILIFYEEKIVKGLQCWIEFHQPQWKQVYMTLVSLSLFIIPASII    |
| <i>Trica</i> -CCAPR-2 | 164 | LVLAWLLSILFSLPTVFLFEKKQVQSMQPQCWIDLQT-WQWKVYITLVALLVLFVFPALII  |
| <i>Schgr</i> -CCAPR-1 | 201 | SACYTVIVSTIWSKGRHMAPPPPYTDARTGSCRPHQLLHQHSHSRLSSGKSRDDEADGRR   |
| <i>Schgr</i> -CCAPR-2 | 222 | TACYTVIVLTIWSKSKVLTPPSRLK-----NGDHRSG-----DDHDSRR              |
| <i>Schgr</i> -CCAPR-3 | 245 | SACYAVIVFTIWSKSKLIAPACGRPG-----GNSRAGSGVSRGPAPSFSDDQDCRR       |
| <i>Rhopr</i> -CCAPR   | 208 | TACYTVIVYTIWTKSIHISRDSQQST-----PLKNGGDKGDDNDIRR                |
| <i>Drome</i> -CCAPR   | 301 | SACYATIVKTIWAKGSIFVPTER-----AGFGAAPARR                         |
| <i>Trica</i> -CCAPR-1 | 202 | ATCYAIIITIWSKN-----A-----KGFIKNTKAVNGSDNSRR                    |
| <i>Trica</i> -CCAPR-2 | 223 | SACYAVIVRTIWSKSKLLIPVGHIP-----RQCDDHRDRPPRHFEHHDTRR            |
| <i>Schgr</i> -CCAPR-1 | 261 | ASSRGIIPKAKIKTVKMTFVIVFVFCWSPYIVFDLLQVYGOVPRQTQANIIVASFIQSL    |
| <i>Schgr</i> -CCAPR-2 | 261 | ASSRGIIPKAKIKTVKMTFVIVFVFCWSPYIVFDLLQVYDHVPTTQTNIIVASFIQSL     |
| <i>Schgr</i> -CCAPR-3 | 296 | ASSRGIIPRAKIKTVKMTFVIVFVFCWSPYIVFDLLQVFGHVPRQTQTMVALATFIQSL    |
| <i>Rhopr</i> -CCAPR   | 250 | ASSRGIIPRAKIKTVKMTFVIVFVFCWSPYIVFDLLQVFGYVPRQTQNIIVATFIQSL     |
| <i>Drome</i> -CCAPR   | 334 | ASSRGIIPRAKIKTVKMTLTIVFVFIICWSPYIIFDLLQVFGQIPHSTQNIIVATFIQSL   |
| <i>Trica</i> -CCAPR-1 | 236 | ASSRGIIPRAKIKTVKMTFVIVFVFCWSPYIIFDLLQVFGQIPGTQNIIVATFIQSL      |
| <i>Trica</i> -CCAPR-2 | 271 | ASSRGIIPRAKIKTVKMTLVIVFVFCWSPYIVFDLLQVYGHIPKQTQNIIVATFIQSL     |

|                       |     | TM-7                                                          |
|-----------------------|-----|---------------------------------------------------------------|
| <i>Schgr</i> -CCAPR-1 | 321 | APLNSAANPVVYCLFSRSASKAIRKVPFRWLRLSLCCPKAAA---AAASPGEEPAPVAAH  |
| <i>Schgr</i> -CCAPR-2 | 321 | APLNSAANPLIYCLFSTHICRSLRRMPPFSWLSCLR-----Q---QARSTTSTNTSSSTAD |
| <i>Schgr</i> -CCAPR-3 | 356 | APLNSAANPVIYCVFSTQICRTLRLKLPLRLWLSVCFPRQAGR---DGRRIYDVTSTVTE  |
| <i>Rhopr</i> -CCAPR   | 310 | APLNSAANPVIYCLFSTHICRALSKLPPFSWICCCFA-N-----RGAESSSIID        |
| <i>Drome</i> -CCAPR   | 394 | APLNSAANPLIYCLFSSQVFRTLSRFPPFKWFTCCCKSYRNNSQQNRCHTVGRRLHNSCD  |
| <i>Trica</i> -CCAPR-1 | 296 | APLNSAANPLIYCLFSTHFCRTLGSLPPFKWLFKFKK-R--R---NRESTTNTQSSSLSE  |
| <i>Trica</i> -CCAPR-2 | 331 | APLNSAANPVIYCLFSTHICRNLR-----                                 |
|                       |     |                                                               |
| <i>Schgr</i> -CCAPR-1 | 378 | TSRRQPPPHWTTTRRQTHRRYIGEGLPFPVAVSI-----V                      |
| <i>Schgr</i> -CCAPR-2 | 373 | TLTSSAPAPRHRAAGSLRQLNSVHFSSV-----L                            |
| <i>Schgr</i> -CCAPR-3 | 413 | TLTQPSSRRRTSASVFRPHDATVSVRLLPASGRRFSNYGNSAASATSVATSAV         |
| <i>Rhopr</i> -CCAPR   | 358 | TVTST-----LRRATIRNQDN-----L                                   |
| <i>Drome</i> -CCAPR   | 454 | SMRTLTTSLTVSRRSTNKTNARVVICERPTKVVT-----VPAMSEV                |
| <i>Trica</i> -CCAPR-1 | 350 | FLTNTHKRKIENTSTTFNAHTVLI-----H                                |
| <i>Trica</i> -CCAPR-2 |     | -----                                                         |

**Multiple sequence alignment of *Schgr*-CCAPRs with other insect CCAPRs.** Identical residues between the aligned sequences are highlighted in black, and conservatively substituted residues in grey. Amino acid position is indicated at the left and dashes indicate gaps that are introduced to maximize similarities in the alignment. Putative transmembrane regions (TM1-5) of *Schgr*-CCAPR-1, -2 and -3 are indicated by dark grey bars and putative transmembrane regions (TM6-7) of *Schgr*-CCAPR-1 and -2 are indicated by light grey bars. Conserved residues that are predicted to form disulphide bridges in extracellular loop 1 and 2 are indicated (\*). Rhodopsin-like DRY motif is boxed in a red dotted line. NXS/T consensus sequences for putative N-glycosylation sites are underlined in red. Abbreviations: CCAPR = crustacean cardioactive peptide receptor, *Schgr* = *Schistocerca gregaria*, *Rhopr* = *Rhodnius prolixus* (AGT02811.1), *Drome* = *Drosophila melanogaster* (AAO66429), *Trica* = *Tribolium castaneum* (1:ABN79651, 2:ABN79652)
