# Supplementary material for: Prothoracicostatic Activity of the Ecdysis-Regulating Neuropeptide Crustacean Cardioactive Peptide (CCAP) in the Desert Locust
Source: MDPI journal article supplement (doi:10.3390/ijms222413465), 2021-12-15
Supplement: s1 [file s1]

**Table S2.**

Oligonucleotide sequences of primers used in cloning and sequence analysis of *Schgr-CCAPpre*, *Schgr-CCAPR-1*, *Schgr-CCAPR-2* and *Schgr-CCAPR-3*.

|                             | <b>Forward primer</b>           | <b>Reverse primer</b>  |
|-----------------------------|---------------------------------|------------------------|
| <i>Schgr-CCAPpre</i>        | ACCCCCACACAGGAAGTACA            | ACAGTACAGGGCAGGGTGAG   |
| <i>Schgr-CCAPpre-nested</i> | ATGTCACGAGCCCTGCTGATG           | CTACCGGCGCCACGGCTT     |
| <i>Schgr-CCAPR-1</i>        | ACCCATGGACGACCTCAA              | TGTGGAGAAGAGGATGATTCC  |
| <i>Schgr-CCAPR-1-nested</i> | <u>CACC</u> ATGGACGACCTCAATGGCA | CTAGACGATGGAGACGACAGC  |
| <i>Schgr-CCAPR-2</i>        | GTGCGTGAGTGCGTGA                | CGTACTCGTGCAGCTAGAGCAC |
| <i>Schgr-CCAPR-2-nested</i> | <u>CACC</u> ATGGACGCCAGCGC      | CTAGAGCACGGACGAGAA     |
| <i>Schgr-CCAPR-3</i>        | CCCGTCCATTGTTACCTGAC            | TGACGTCGTAACATCGTCGT   |
| <i>Schgr-CCAPR-3-nested</i> | <u>CAC</u> ATGGGGCCATGGAG       | CTGCGTCAGACGGCCGACGTG  |

Abbreviations: *Schgr*: *Schistocerca gregaria* CCAPpre = crustacean cardioactive peptide precursor, CCAPR = crustacean cardioactive peptide receptor. A partial Kozak sequence (CACC) was added to the 5' end of the forward primers of *Schgr-CCAPR-1-nested*, *Schgr-CCAPR-2-nested*, *Schgr-CCAPR-3-nested* to allow initiation of translation in mammalian cells.
