# Supplementary material for: Prothoracicostatic Activity of the Ecdysis-Regulating Neuropeptide Crustacean Cardioactive Peptide (CCAP) in the Desert Locust
Source: MDPI journal article supplement (doi:10.3390/ijms222413465), 2021-12-15
Supplement: s1 [file s1]

**Figure S6**

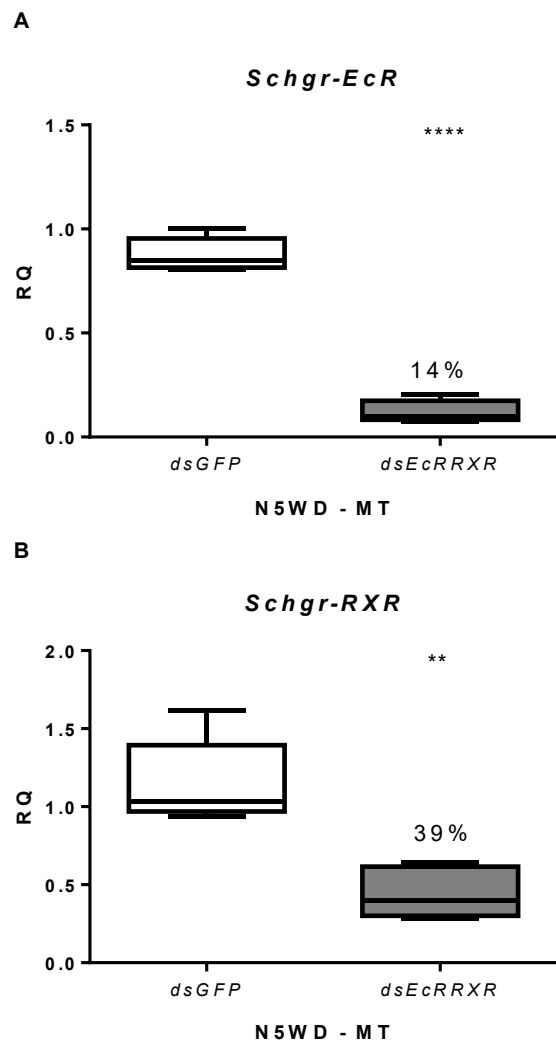

**Effect of the RNAi-mediated knockdown on A) *Schgr-EcR* and B) *Schgr-RXR* transcript levels in Malpighian tubules** as caused by *dsGFP*- and *dsEcR/RXR*-injections in fifth instar nymphs at weight decrease. *dsRNA* constructs were injected at N5D0. A boost injection was administered at N5D3. Significant differences ( $p < 0.01$  and  $p < 0.0001$ ) are indicated by asterisks (\*\*) and (\*\*\*\*, respectively) and were calculated by an unpaired Student's T-Test.
