# Supplementary material for: Prothoracicostatic Activity of the Ecdysis-Regulating Neuropeptide Crustacean Cardioactive Peptide (CCAP) in the Desert Locust
Source: MDPI journal article supplement (doi:10.3390/ijms222413465), 2021-12-15
Supplement: s1 [file s1]

Figure S7

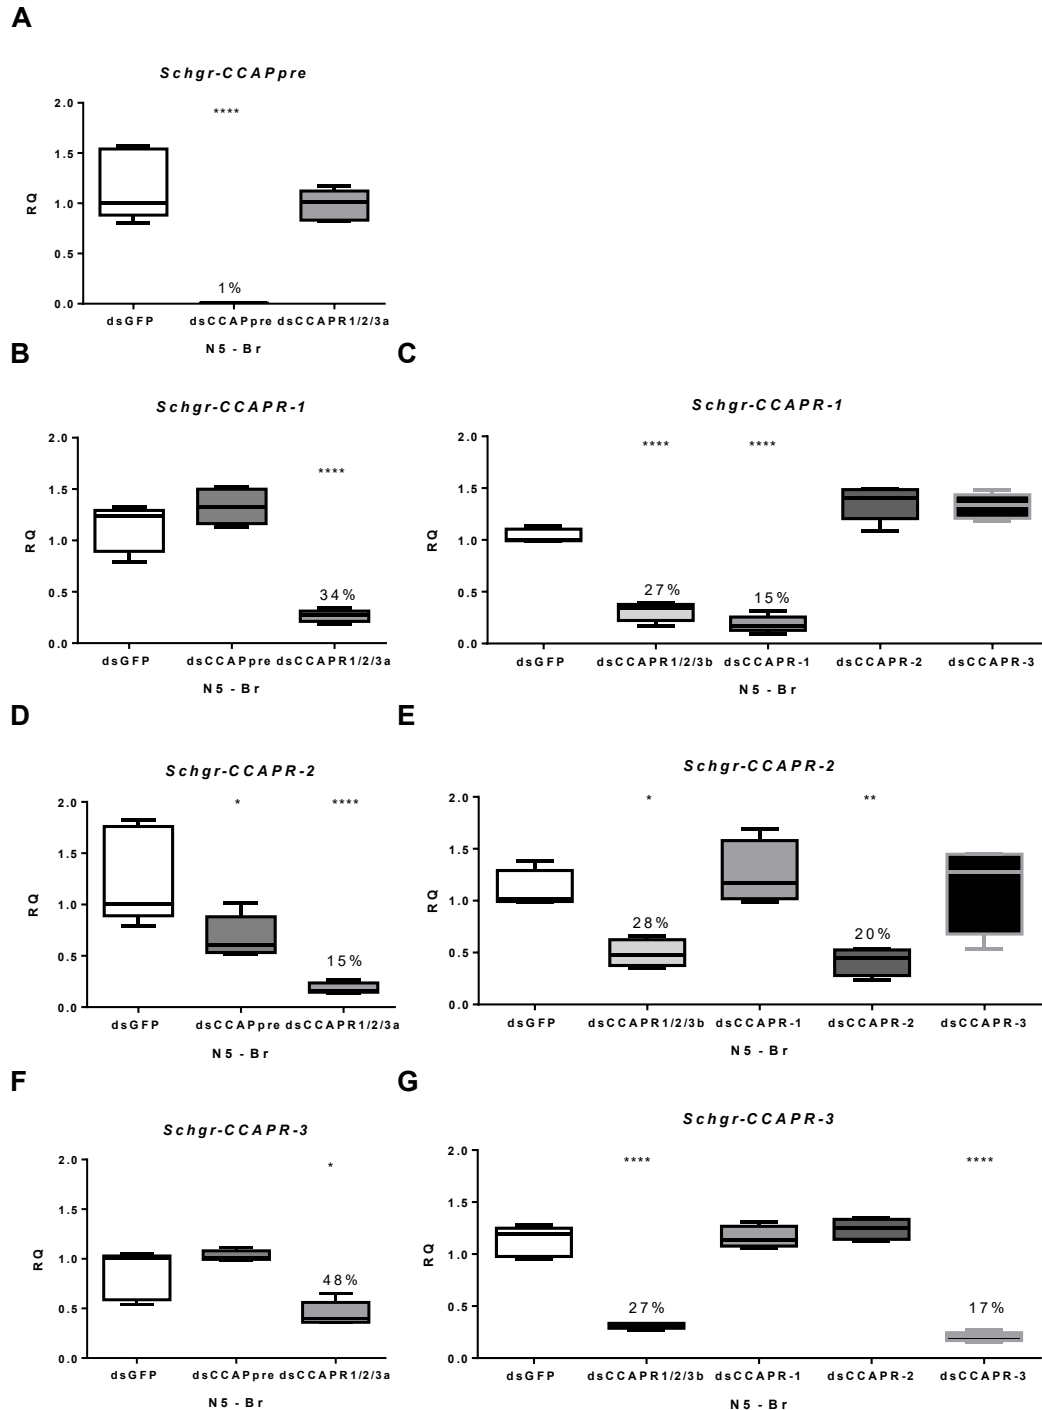

**Effect of the RNAi-mediated knockdown on *Schgr-CCAPpre* and *Schgr-CCAPR-1*, -2 and-3 transcript levels in brain as caused by *dsGFP*-, *dsCCAPpre*-, *dsCCAPR1/2/3a*-, *dsCCAPR1/2/3b*-, *dsCCAPR-1*, *dsCCAPR-2* or *dsCCAPR-3*-injections in fifth instar (N5) *S. gregaria* nymphs.** A) Relative quantities of *Schgr-CCAPpre* transcript levels in *dsGFP*, *dsCCAPpre* and *dsCCAPR1/2/3a* treated nymphs. B) Relative quantities of *Schgr-CCAPR-1* transcript levels in *dsGFP*, *dsCCAPpre* and *dsCCAPR1/2/3a* treated nymphs and in C) *dsGFP*, *dsCCAPR1/2/3b*, *dsCCAPR-1*, *dsCCAPR-2* and *dsCCAPR-3* treated nymphs. D) Relative quantities of *Schgr-CCAPR-2* transcript levels in *dsGFP*, *dsCCAPpre* and *dsCCAPR1/2/3a* treated nymphs and in E) *dsGFP*, *dsCCAPR1/2/3b*, *dsCCAPR-1*,

*dsCCAPR-2* and *dsCCAPR-3* treated nymphs. F) Relative quantities of *Schgr-CCAPR-3* transcript levels in *dsGFP*, *dsCCAPpre* and *dsCCAPR1/2/3a* treated nymphs and in G) *dsGFP*, *dsCCAPR1/2/3b*, *dsCCAPR-1*, *dsCCAPR-2* and *dsCCAPR-3* treated nymphs. *dsRNA* constructs were injected at N4D0. Boost injections were administered at N4D3, N5D1, N5D4. Significant differences ( $p < 0.05$  and  $p < 0.0001$ ) are indicated by asterisks (\* and \*\*\*, respectively) and were calculated by One-way ANOVA, followed by a Dunnett's Test.
