# Supplementary material for: Prothoracicostatic Activity of the Ecdysis-Regulating Neuropeptide Crustacean Cardioactive Peptide (CCAP) in the Desert Locust
Source: MDPI journal article supplement (doi:10.3390/ijms222413465), 2021-12-15
Supplement: s1 [file s1]

**Table S3**

Oligonucleotide sequences for primers used in *dsRNA* construct design. Underlined sequences are the T7 promoter sequences.

| <b>dsRNA construct</b> | <b>Forward primer</b>                                          | <b>Reverse primer</b>                                           |
|------------------------|----------------------------------------------------------------|-----------------------------------------------------------------|
| <i>dsCCAPpre</i>       | 5'- <u>TAATACGACTCACTATAGGGAGA</u><br>GGCACTCTGCTGGAGATGA-3'   | 5'- <u>TAATACGACTCACTATAGGGAGA</u><br>CAGTGGGCGAGAGAAGTCTG-3'   |
| <i>dsCCAPR1/2/3a</i>   | 5'- <u>TAATACGACTCACTATAGGGAGA</u><br>CTACGAGACGGAGCAGTTC-3'   | 5'- <u>TAATACGACTCACTATAGGGAGA</u><br>ATGGCGTCGTAGCGATCTAT-3'   |
| <i>dsCCAPR1/2/3b</i>   | 5'- <u>TAATACGACTCACTATAGGGAGA</u><br>AGCTGTACATGACGCTGGTG-3'  | 5'- <u>TAATACGACTCACTATAGGGAGA</u><br>CCACGAACATGAAGACGATG-3'   |
| <i>dsCCAPR-1</i>       | 5'- <u>TAATACGACTCACTATAGGGAGA</u><br>TCGCTGTGCTGCCCCAA-3'     | 5'- <u>TAATACGACTCACTATAGGGAGA</u><br>CTAGACGATGGAGACGACAGCT-3' |
| <i>dsCCAPR-2</i>       | 5'- <u>TAATACGACTCACTATAGGGAGA</u><br>CTACTGCCTCTTCTCCACGC-3'  | 5'- <u>TAATACGACTCACTATAGGGAGA</u><br>CCTCAGAAGTGCACCCTGTT-3'   |
| <i>dsCCAPR-3</i>       | 5'- <u>TAATACGACTCACTATAGGGAGA</u><br>TCACCAGCCCCGACTCGGAG-3'  | 5'- <u>TAATACGACTCACTATAGGGAGA</u><br>AGGTGGCTGCAGTGTAGAGGA-3'  |
| <i>dsGFP</i>           | 5'- <u>TAATACGACTCACTATAGGGAGA</u><br>AAGGTGATGCTACATACGGAA-3' | 5'- <u>TAATACGACTCACTATAGGGAGA</u><br>ATCCCAGCAGCAGTTACAAAC-3'  |

Abbreviations: *CCAPpre* = crustacean cardioactive peptide precursor, *CCAPR* = crustacean cardioactive peptide receptor, *GFP* = green fluorescent protein
