# Supplementary material for: Prothoracicostatic Activity of the Ecdysis-Regulating Neuropeptide Crustacean Cardioactive Peptide (CCAP) in the Desert Locust
Source: MDPI journal article supplement (doi:10.3390/ijms222413465), 2021-12-15
Supplement: s1 [file s1]

Figure S5

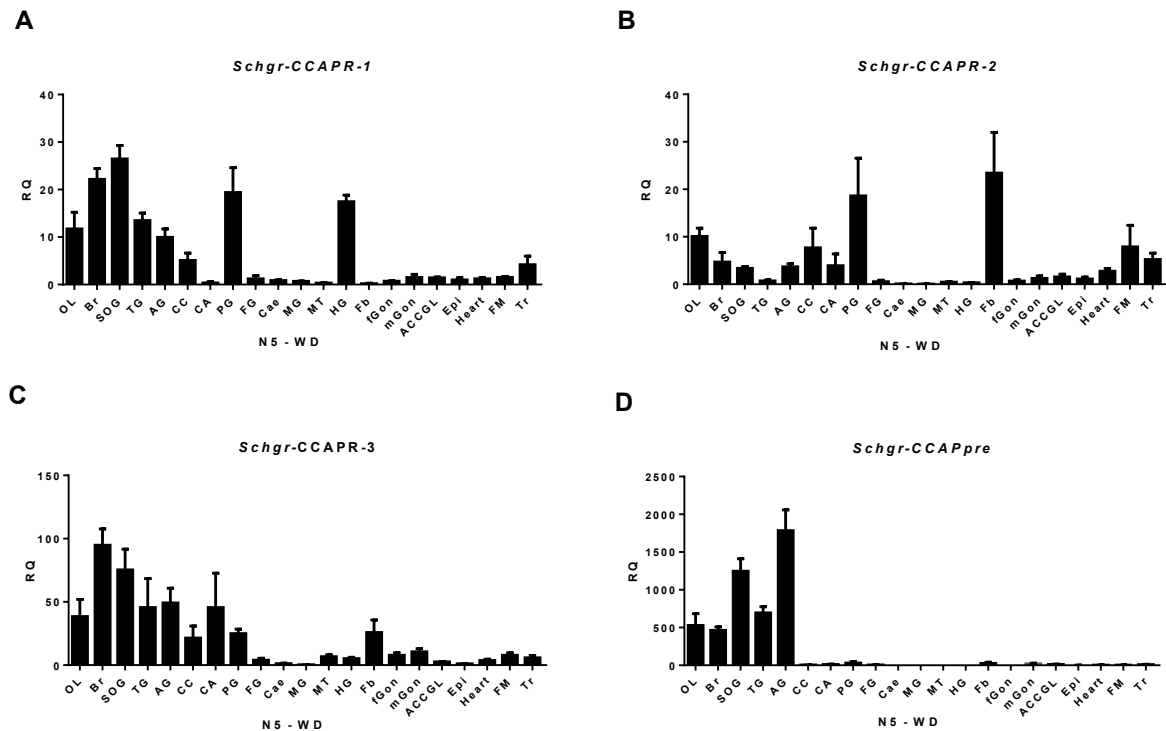

**Tissue distribution of CCAP precursor and receptor transcripts in fifth nymphal (N5) *S. gregaria* at the molt cycle moment of weight decrease (WD).** A) Transcript profile of *Schgr-CCAPR-1*, B) *Schgr-CCAPR-2*, C) *Schgr-CCAPR-3* and D) *Schgr-CCAPpre*. The data represent mean values  $\pm$ S.E.M. of three independent pools of five animals, run in duplicate and normalized relative to *EF1 $\alpha$*  and *RP49* reference gene transcript levels. Abbreviations used: OL = optic lobes, Br = brain, SOG = suboesophageal ganglion, TG = thoracic ganglia, AG = abdominal ganglia, CC = corpora cardiaca, CA = corpora allata; PG = prothoracic glands, FG = foregut, Cae = caeca, MG = midgut, MT = Malpighian tubules HG = hindgut, Fb = fat body, fGon = female gonads, mGon = male gonads, ACCGL = male accessory glands, Epi = epidermis, FM = flight muscle and Tr = Trachea.
