# Supplementary material for: Prothoracicostatic Activity of the Ecdysis-Regulating Neuropeptide Crustacean Cardioactive Peptide (CCAP) in the Desert Locust
Source: MDPI journal article supplement (doi:10.3390/ijms222413465), 2021-12-15
Supplement: s1 [file s1]

Figure S4

A

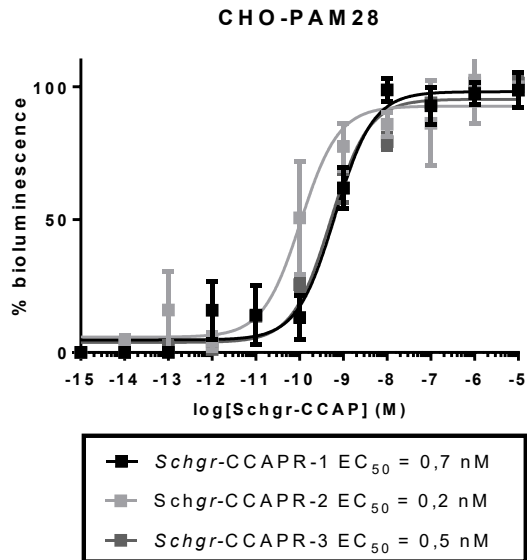

B

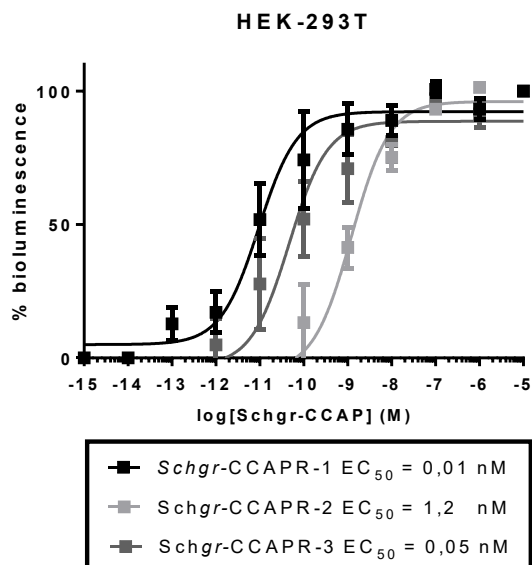

**Dose-response curves induced by CCAP for cell-based receptor activity assays A) in CHO-PAM28-*Schgr*-CCAPR-1, -2 or -3 cells and B) in HEK293T *Schgr*-CCAPR-1, -2 or -3 cells, co-transfected with CRE<sub>(6x)</sub>-Luc construct.** These cell-based receptor activity data were obtained from three independent experiments. The bioluminescence was measured in triplicate per concentration of *Schgr*-CCAP and per transfection. Error bars represent the S.E.M and the 100 % level refers to the maximal response level. The zero-response level corresponds to treatment with BSA medium only. In addition, the half maximal effective concentrations ( $EC_{50}$  values) are indicated. Abbreviations used: *Schgr* = *Schistocerca gregaria*, CCAPR = crustacean cardioactive peptide receptor, CHO-PAM28 = chinese hamster ovary PAM28 cells and HEK-293T = human embryonic kidney 293 T cells.
