# Supplementary material for: Prothoracicostatic Activity of the Ecdysis-Regulating Neuropeptide Crustacean Cardioactive Peptide (CCAP) in the Desert Locust
Source: MDPI journal article supplement (doi:10.3390/ijms222413465), 2021-12-15
Supplement: s1 [file s1]

**Figure S3.**

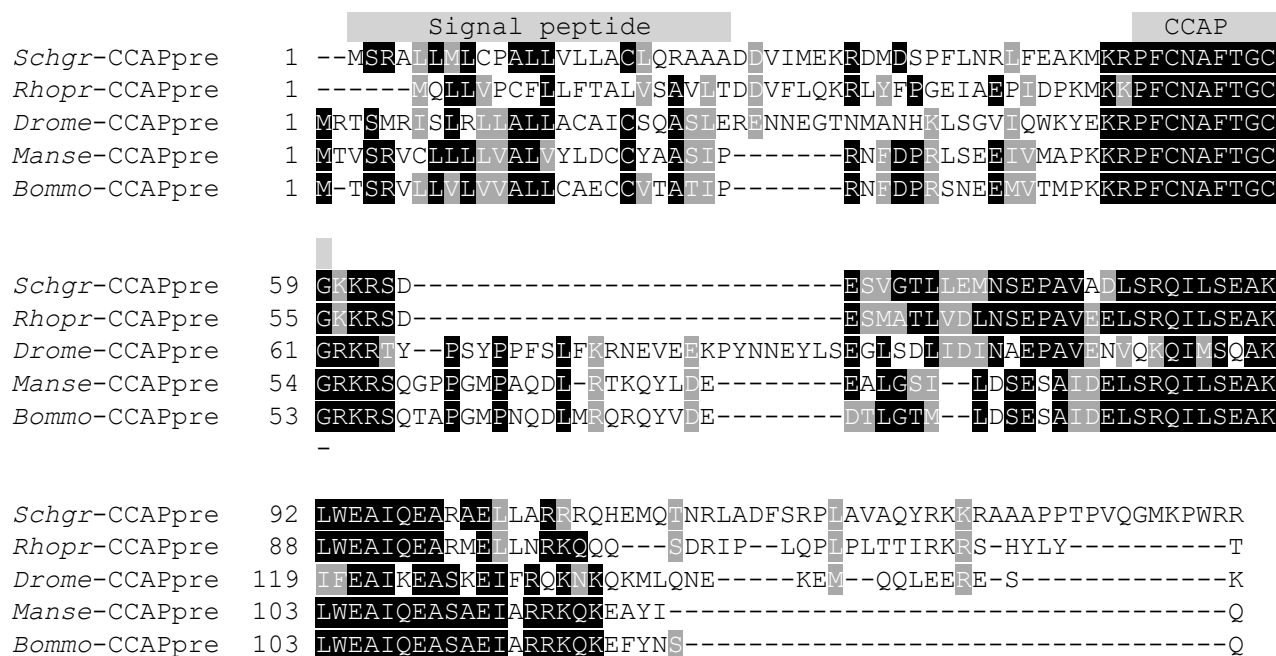

**Multiple sequence alignment of insect CCAP precursors.** Identical residues between the aligned sequences are highlighted in black, and conservatively substituted residues in grey. Amino acid position is indicated at the left and dashes indicate gaps that are introduced to maximize similarities in the alignment. The signal peptide and CCAP peptide sequence are indicated by dark grey bars. Abbreviations: CCAPpre = crustacean cardioactive prepropeptide, *Schgr* = *Schistocerca gregaria*, *Rhopr* = *Rhodnius prolixus* (ADK73625.1), *Drome* = *Drosophila melanogaster* (AGB96226.1), *Manse* = *Manduca sexta* (AAL39064.1), *Bommo* = *Bombyx mori* (BAG50376.1).
