# Supplementary material for: Prothoracicostatic Activity of the Ecdysis-Regulating Neuropeptide Crustacean Cardioactive Peptide (CCAP) in the Desert Locust
Source: MDPI journal article supplement (doi:10.3390/ijms222413465), 2021-12-15
Supplement: s1 [file s1]

**Table S1. Structure of the peptides used in current study.**

| <b>Peptide</b>        | <b>Amino acid sequence</b>                    |
|-----------------------|-----------------------------------------------|
| <i>Schgr</i> -CCAP    | PF <b>C</b> NAFTG <b>C</b> amide              |
| <i>Schgr</i> -CHHa2.1 | G <b>C</b> MAFGHS <b>C</b> FGGHamide          |
| <i>Schgr</i> -CHHa2.2 | AGG <b>C</b> MAFGHS <b>C</b> FGGHamide        |
| <i>Schgr</i> -ASTC    | pQRKPRYYR <b>C</b> YFNPIS <b>C</b> Famide     |
| <i>Schgr</i> -ASTCCC  | SYWKQ <b>C</b> AFNAV <b>S</b> <b>C</b> Famide |
| <i>Schgr</i> -Crz     | pQTFQYSHGWTNamide                             |
| <i>Schgr</i> -AKH-I   | pQLNFTP <b>N</b> WG <b>T</b> amide            |
| <i>Schgr</i> -AKH-II  | pQLNFSTGWamide                                |
| <i>Schgr</i> -INT     | <b>C</b> LIT <b>N</b> <b>C</b> PRGamide       |

The cysteine residues that form a disulphide bridge are depicted in a red bold “C” letter. Abbreviations used: *Schgr* = *Schistocerca gregaria*; CCAP = crustacean cardioactive peptide; CHHa = CHHamide; ASTC = allatostatin C; ASTCCC = Allatostatin CCC; Crz = corazonin; AKH-I = adipokinetic hormone I; AKH-II = adipokinetic hormone II; INT = inotocin.
